# Supplementary material for: Regulating the weak solvation structure in electrolyte for high-rate Li-metal batteries at low temperature
Source: Royal Society of Chemistry journal article supplement (doi:10.1039/d3ta04676a), 2023-01-01
Supplement: d3ta04676a1.pdf [file d3ta04676a1.pdf]

Supporting information

**Regulating Weak Solvation Structure in Electrolyte for  
High-Rate Li-Metal Batteries at Low Temperature**

*Hao Yu, Weihao Wang, Youquan Zhang, Yuejiao Chen, Libao Chen, Liangjun Zhou\*,*

*Weifeng Wei*

H Yu, W.H. Wang, Y.Q. Zhang, Prof. Y.J. Chen, Prof. L.B. Chen, Prof. L.J. Zhou, Prof.

W.F. Wei

State Key Laboratory of Powder Metallurgy, Central South University, Changsha,

Hunan 410083, China

\*Corresponding author

E-mail: [alexander-zhou@csu.edu.cn](mailto:alexander-zhou@csu.edu.cn)

**Table S1.** Summary of the ionic conductivity at low temperature with different electrolytes

| No        | Electrolyte formula                                             | -20 °C | -40 °C | -60 °C (mS/cm) |
|-----------|-----------------------------------------------------------------|--------|--------|----------------|
| 1         | 1M LiPF <sub>6</sub><br>EC/EMC/DEC/MA(1:1:1:1)                  | 5.5    | 3.4    | 0.26           |
| 2         | 1M LiPF <sub>6</sub><br>EC/EMC/TFENH(1:4:1)                     | 3.2    | 0.53   |                |
| 3         | 1M LiTFSI DOL/DME(8:2)                                          | 5.6    | 3.2    | 0.92           |
| 4         | 2M LiFSI/BFE                                                    | 2.8    | 1.87   | 0.95           |
| 5         | 0.75 M LiPF <sub>6</sub><br>EC/EMC/MTFA(1:4:2)                  | 2.2    | 0.43   |                |
| 6         | 1M LiPF <sub>6</sub> MP/FEC(9:1)                                | 6.3    | 4.1    | 2.1            |
| 7         | 0.7M LiPF <sub>6</sub> +0.3M LiBF <sub>4</sub><br>EC/DMC/EMC/BA | 0.828  | 0.726  |                |
| 8         | 1M LiPF <sub>6</sub> MTFP/FEC(9:1)                              |        | 3.2    | 1.68           |
| This work | 0.5M LiDFOB+0.5M LiBF <sub>4</sub><br>IZ/EMC/FEC(5:2:3)         | 6.9    | 3.87   | 1.86           |

**Table S2.** Summary of the Li<sup>+</sup> transference number with different electrolytes

| No        | Electrolyte formula                                  | t <sub>Li+</sub> (25°C) |
|-----------|------------------------------------------------------|-------------------------|
| 9         | LiFSA/SL/HFE(1:2.5:2)                                | 0.38                    |
| 10        | 0.9 M LiFSI+0.1MLiDFOB IZ/FEC(7:3)                   | 0.53                    |
| 11        | 1M LiTFSI MP/FEC(9:1)+HFE+LiDFOB                     | 0.61                    |
| 12        | 1 M LiTFSI in [EMIM][TFSI]<br>with 20 wt.% of PIL    | 0.41                    |
| 13        | 1M LiFSI-DTDL                                        | 0.75                    |
| This work | 0.5M LiDFOB+0.5M LiBF <sub>4</sub> IZ/EMC/FEC(5:2:3) | 0.56                    |

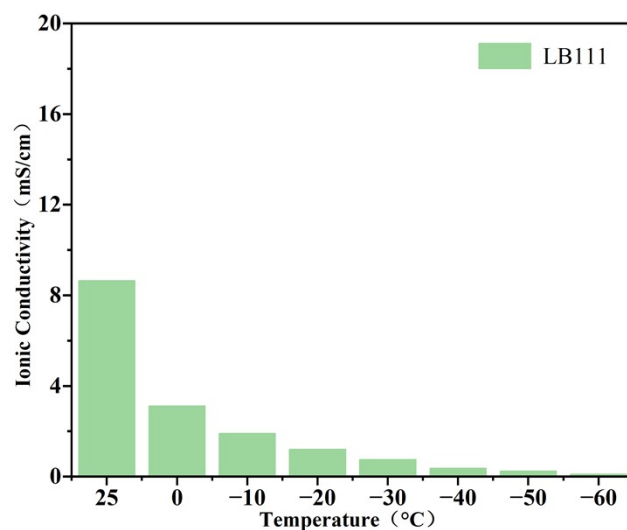

**Figure S1.** Ionic conductivities of LB111 electrolyte from 25 to  $-60$  °C.

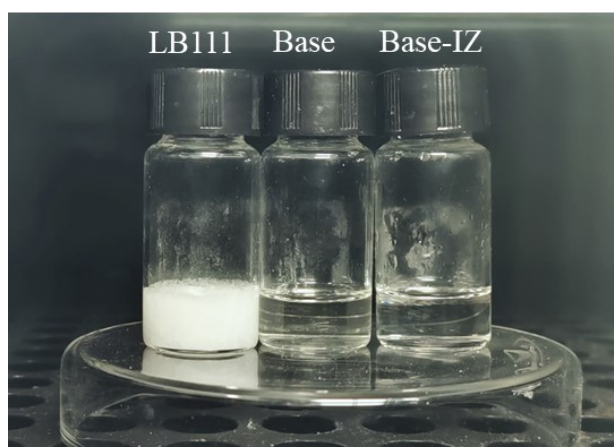

**Figure S2.** The photographs of different electrolytes at  $-60$  °C.

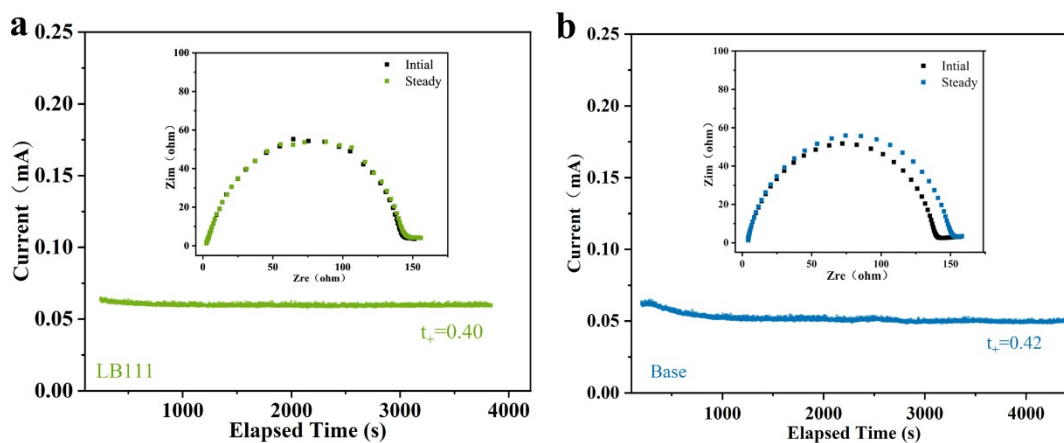

**Figure S3.**  $t_{Li^+}$  of LB111 and Base electrolytes.

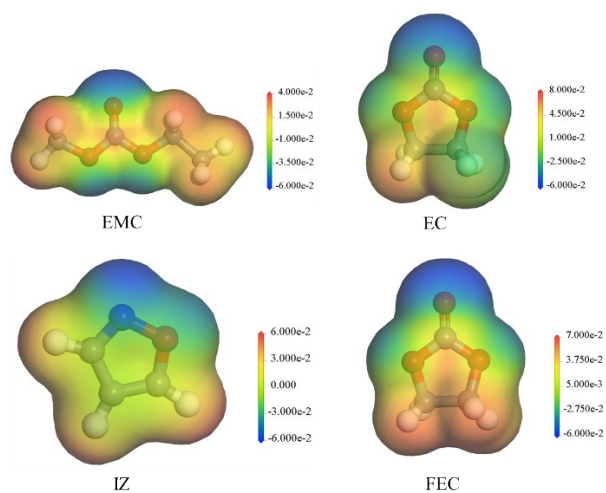

**Figure S4.** ESP of different solvents.

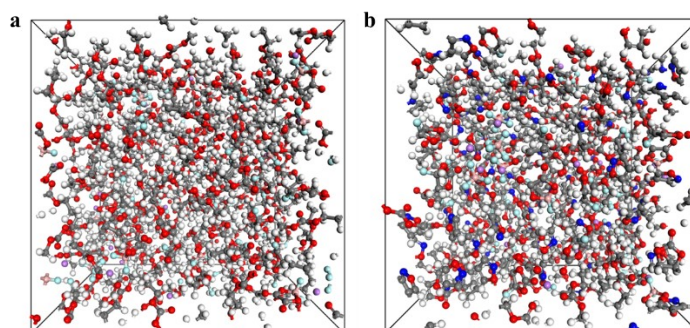

**Figure S5.** Snapshots of MD simulation for a) Base and b) Base-IZ.

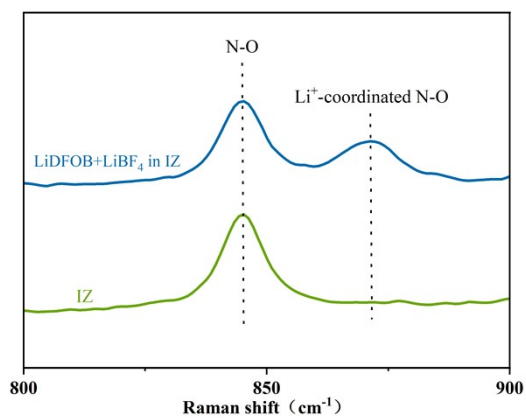

**Figure S6.** Raman spectra of electrolytes with IZ.

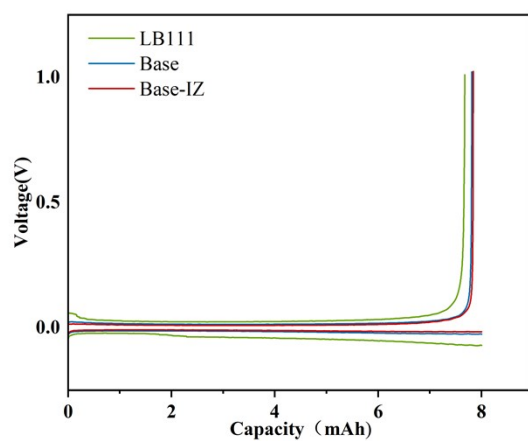

**Figure S7.** The corresponding deposition/stripping curves in different electrolytes.

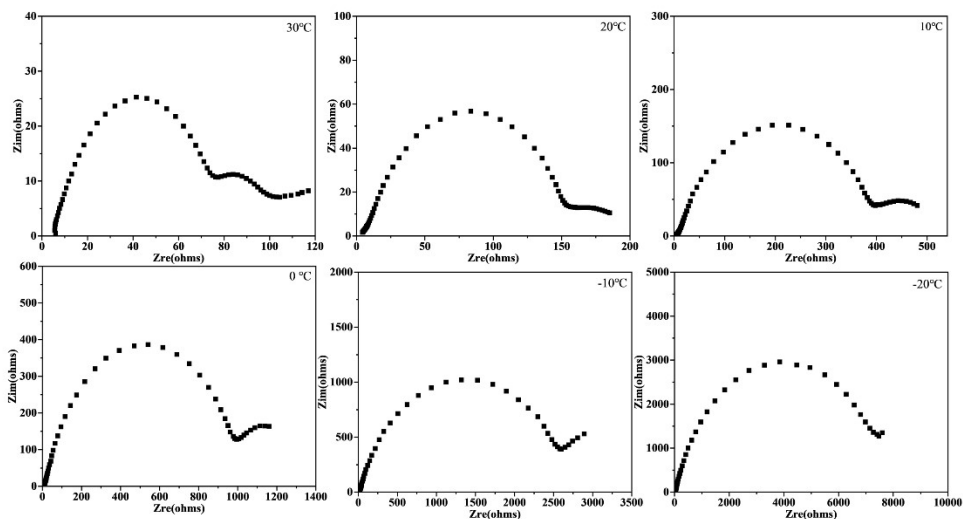

**Figure S8.** EIS measurements of Li||Li symmetric cells at varies temperatures from  $-20$  to  $30$  °C in LB111.

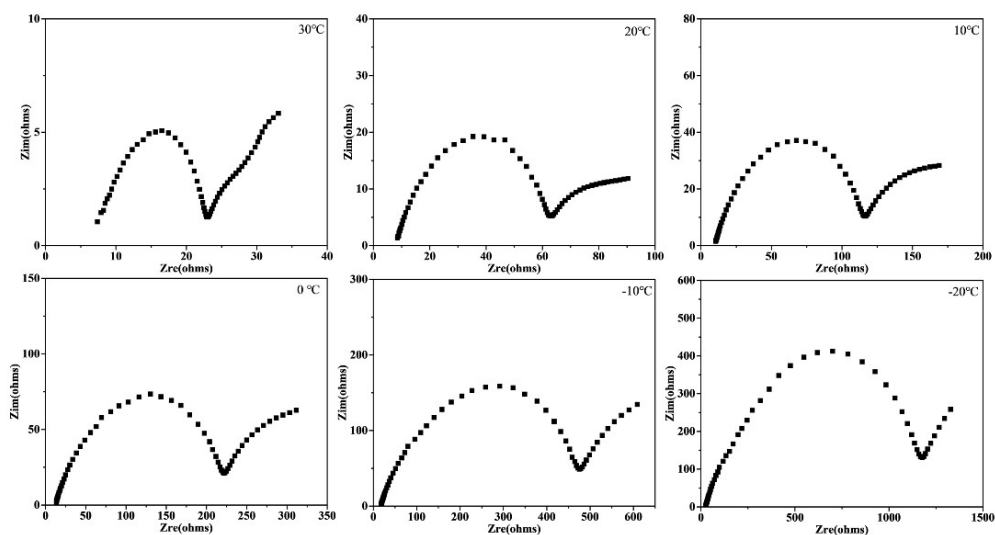

**Figure S9.** EIS measurements of Li||Li symmetric cells at varies temperatures from  $-20$  to  $30$  °C in Base.

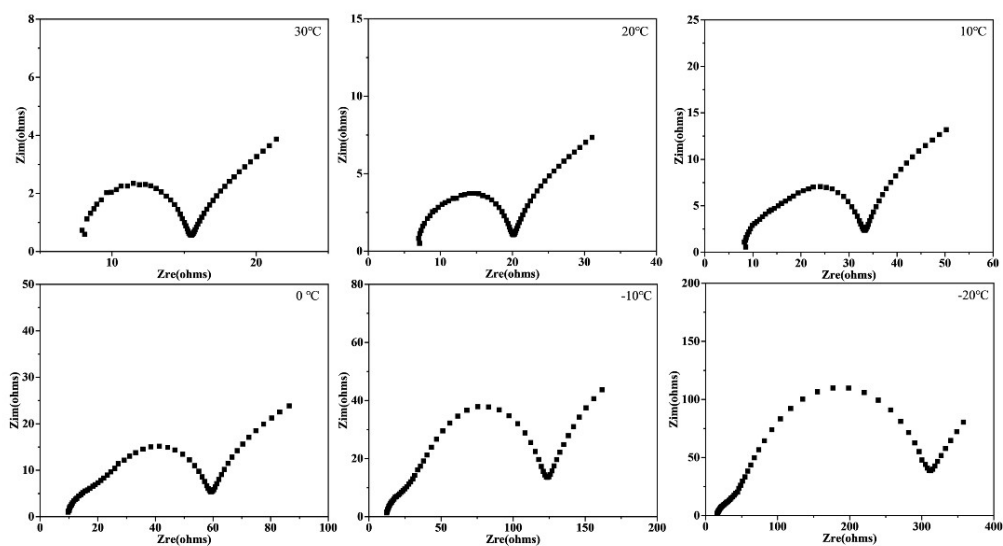

**Figure S10.** EIS measurements of Li||Li symmetric cells at varies temperatures from  $-20$  to  $30$  °C in Base-IZ.

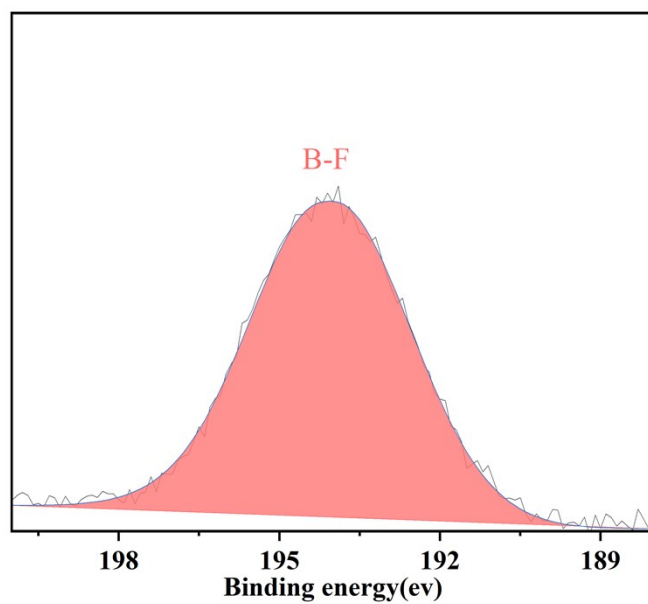

**Figure S11.** XPS spectrum of B 1s in Li metal anodes after 20 cycles with Base-IZ.

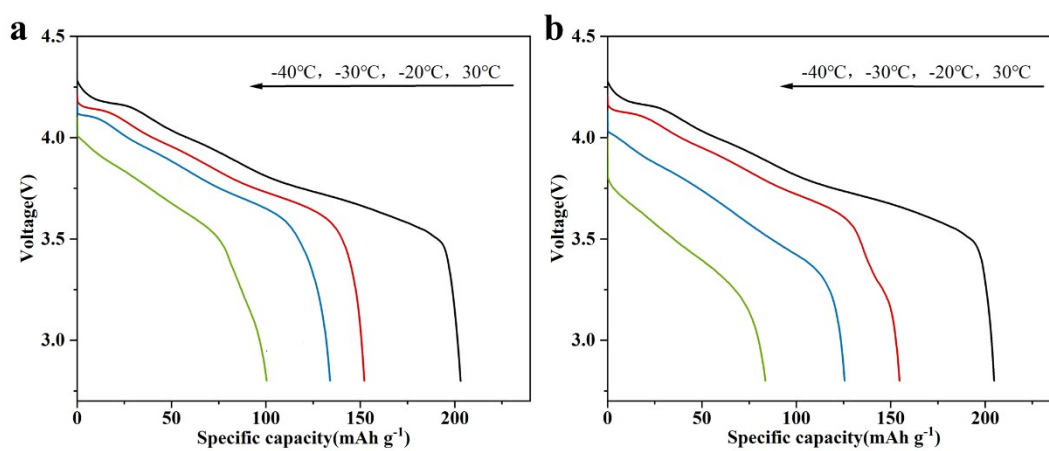

**Figure S12.** Discharge curves of NCM811 cell with a) 0.5M LiDFOB +0.5M LiBF<sub>4</sub> in IZ/EMC/FEC=3:5:2; and b) 1M LiPF<sub>6</sub> in IZ/EMC/FEC=5:2:3 under various temperatures.

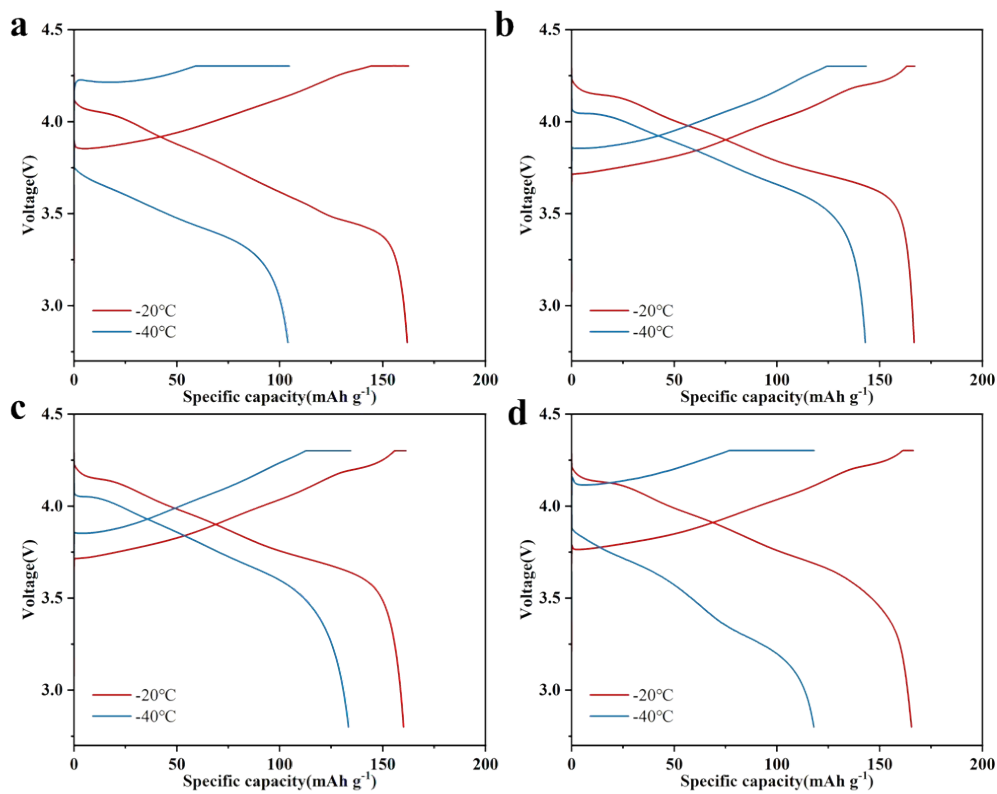

**Figure S13.** Charge and discharge curves of NCM811 cells with a) 1M LiBF<sub>4</sub> in IZ/EMC/FEC=5:2:3; b) 1M LiDFOB in IZ/EMC/FEC=5:2:3; c) 0.5M LiDFOB +0.5M LiBF<sub>4</sub> in IZ; d) 0.5M LiDFOB +0.5M LiBF<sub>4</sub> in IZ/DME/FEC=5:2:3 under various temperatures.

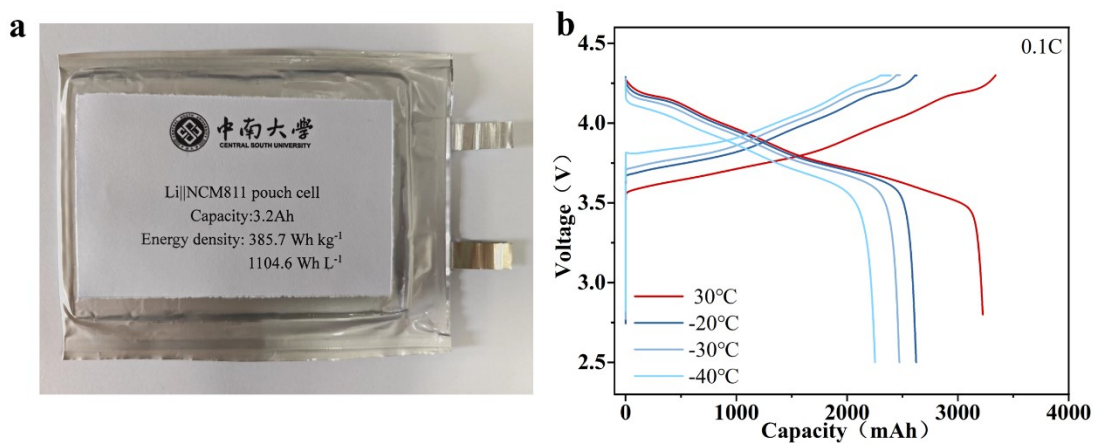

**Figure S14.** a) Digital photograph and b) the charge/discharge curves at 0.1 C under various temperatures of the NCM811||Li pouch battery (3.2 Ah).



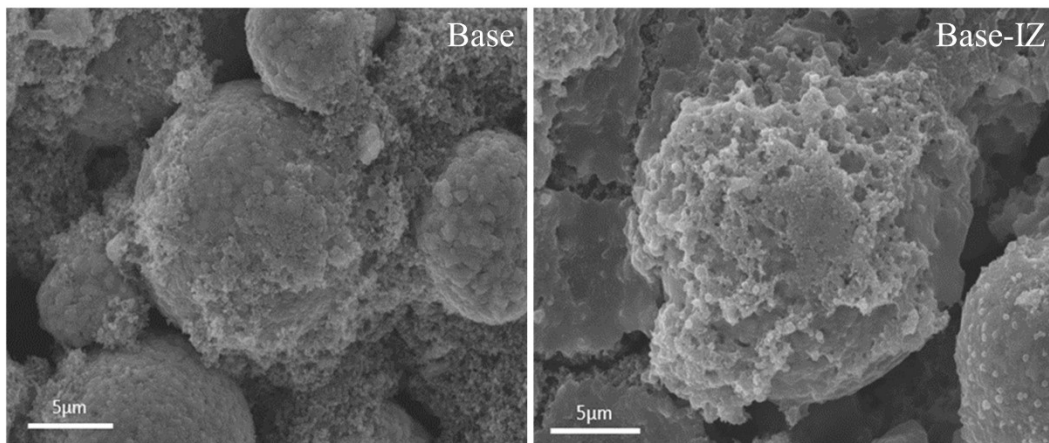

**Figure S15.** SEM images of the positive electrodes from cells with different electrolytes after cycling at  $-40\text{ }^{\circ}\text{C}$ .

## Reference

1. M. C. Smart, B. V. Ratnakumar and S. Surampudi, *Journal of the Electrochemical Society*, 2002, 149, A361-A370.
2. W. Lu, K. Xie, Z. X. Chen, S. Z. Xiong, Y. Pan and C. M. Zheng, *Journal of Power Sources*, 2015, 274, 676-684.
3. A. C. Thenuwara, P. P. Shetty and M. T. McDowell, *Nano Letters*, 2019, 19, 8664-8672.
4. G. Zhang, J. Chang, L. Wang, J. Li, C. Wang, R. Wang, G. Shi, K. Yu, W. Huang, H. Zheng, T. Wu, Y. Deng and J. Lu, *Nature communications*, 2023, 14, 1081-1081.
5. W. Lu, K. Xie, Y. Pan, Z. X. Chen and C. M. Zheng, *Journal of Fluorine Chemistry*, 2013, 156, 136-143.
6. Y.-G. Cho, M. Li, J. Holoubek, W. Li, Y. Yin, Y. S. Meng and Z. Chen, *ACS Energy Letters*, 2021, 6, 2016-2023.
7. W. Lv, C. Zhu, J. Chen, C. Ou, Q. Zhang and S. Zhong, *Chemical Engineering Journal*, 2021, 418.
8. J. Holoubek, M. Yu, S. Yu, M. Li, Z. Wu, D. Xia, P. Bhaladhare, M. S. Gonzalez, T. A. Pascal, P. Liu and Z. Chen, *ACS Energy Letters*, 2020, 5, 1438-1447.
9. Y. Watanabe, Y. Ugata, K. Ueno, M. Watanabe and K. Dokko, *Physical Chemistry Chemical Physics*, 2023, 25, 3092-3099.
10. Y. Yin, T. Zheng, J. Chen, Y. Peng, Z. Fang, Y. Mo, C. Wang, Y. Wang, Y. Xia and X. Dong, *Advanced Functional Materials*, 2023, n/a, 2215151.
11. P. Lai, B. Huang, X. Deng, J. Li, H. Hua, P. Zhang and J. Zhao, *Chemical Engineering Journal*, 2023, 461, 141904.
12. M. Safa, A. Chamaani, N. Chawla and B. El-Zahab, *Electrochimica Acta*, 2016, 213, 587-593.
13. Y. Zhao, T. H. Zhou, T. Ashirov, M. El Kazzi, C. Cancellieri, L. P. H. Jeurgens, J. W. Choi and A. Coskun, *Nature Communications*, 2022, 13.
